# Supplementary material
Source: PubMed Central journal article supplement (PMC3963476)

## Supplementary Data – MacKenzie Ross et al.

Contents: 1 table and 3 figures with legends

Supplementary Table 1. Numbers of successfully immunostained lesions by antibody and diagnostic category

| Antibody      | BCN             | BIN | DN | MIS | MIV | VGP |
|---------------|-----------------|-----|----|-----|-----|-----|
| pCHEK2(Thr68) | 10 <sup>1</sup> | 14  | 12 | 11  | 12  | 17  |
| p-p53(Ser20)  | 10              | 14  | 10 | 11  | 12  | 17  |
| p16           | 9               | 14  | 10 | 10  | 12  | 17  |
| nucleolin     | 9               | 13  | 10 | 11  | 11  | 16  |
| p21           | 9               | 14  | 9  | 10  | 12  | 16  |

<sup>1</sup>For each antibody and diagnostic category the number of lesions successfully stained and with interpretable results is shown.

## Supplementary Figure legends

**Figure S1. Established ATM/CHEK2 pathways: summary.** P indicates phosphorylation; arrows mean activation and T-bars mean inhibition. Pathways in black are normal; those in red are activated in DNA damage signaling and short-telomere-mediated cell senescence.

**Figure S2. Supporting data for Figure 2.** b, d, f and h show RGB blue channel for images a, c, e and g. Scale bar for (a-i), 50  $\mu\text{m}$  and for (j-k), 10  $\mu\text{m}$ . (a, b) control section of BIN seen in Figure 2a and b. Virtually no brown color. (c,d) Control section of VGP seen in Figure 2c-f. Fine cytoplasmic melanin granulation present in the melanoma cell groups. (e,f) pCHEK2 present in many normal epidermal cells near a BIN; subnuclear foci (arrow) or sometimes pan-nuclear in stratum spinosum. (g,h) p-p53 in same area of epidermis. About 1-4 subnuclear foci per cell. (i) 10 or more p-p53-positive foci per cell in part of a VGP melanoma (blue channel only shown). (j, k) Higher magnification of mitotic cells, positive for foci of (j) pCHEK2 and (k) p-p53 (arrows). The foci are generally associated with the chromosomes, at peripheral positions consistent with telomeres.

**Figure S3. RGB blue channel from all panels of Figure 4.** To emphasize immunostain.

**DNA damage/short telomeres**

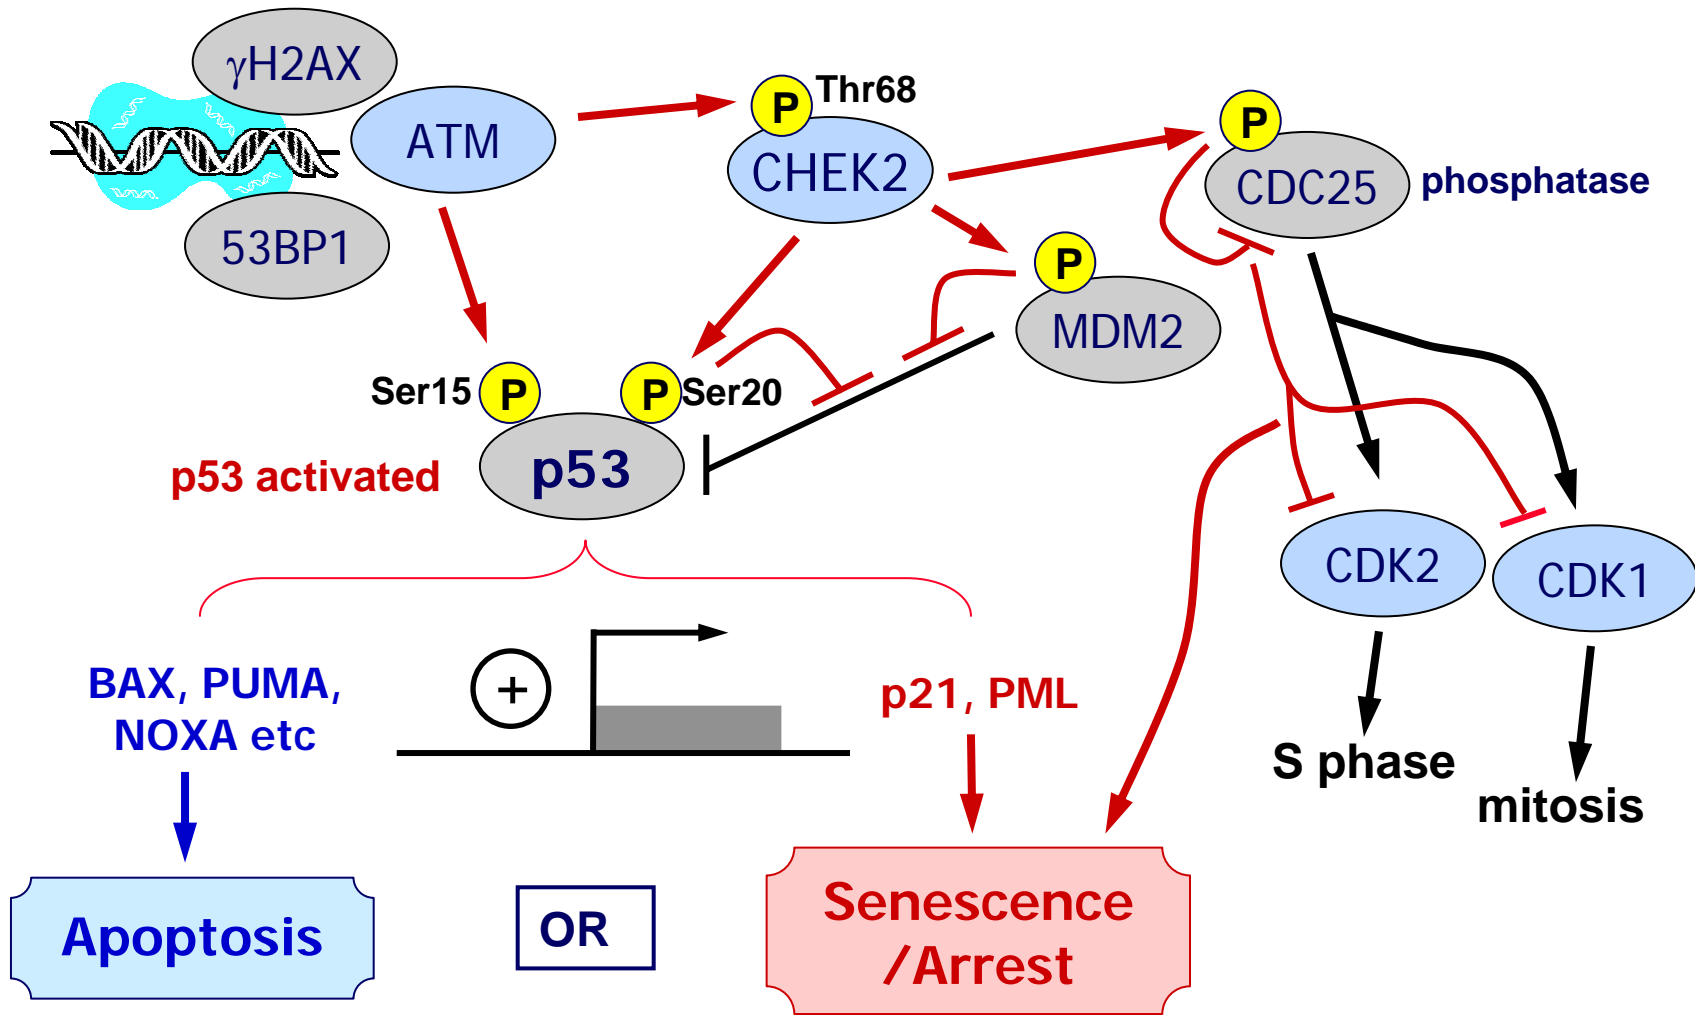

**Figure S1: Established ATM/CHEK2 pathways: summary.**

Figure S2

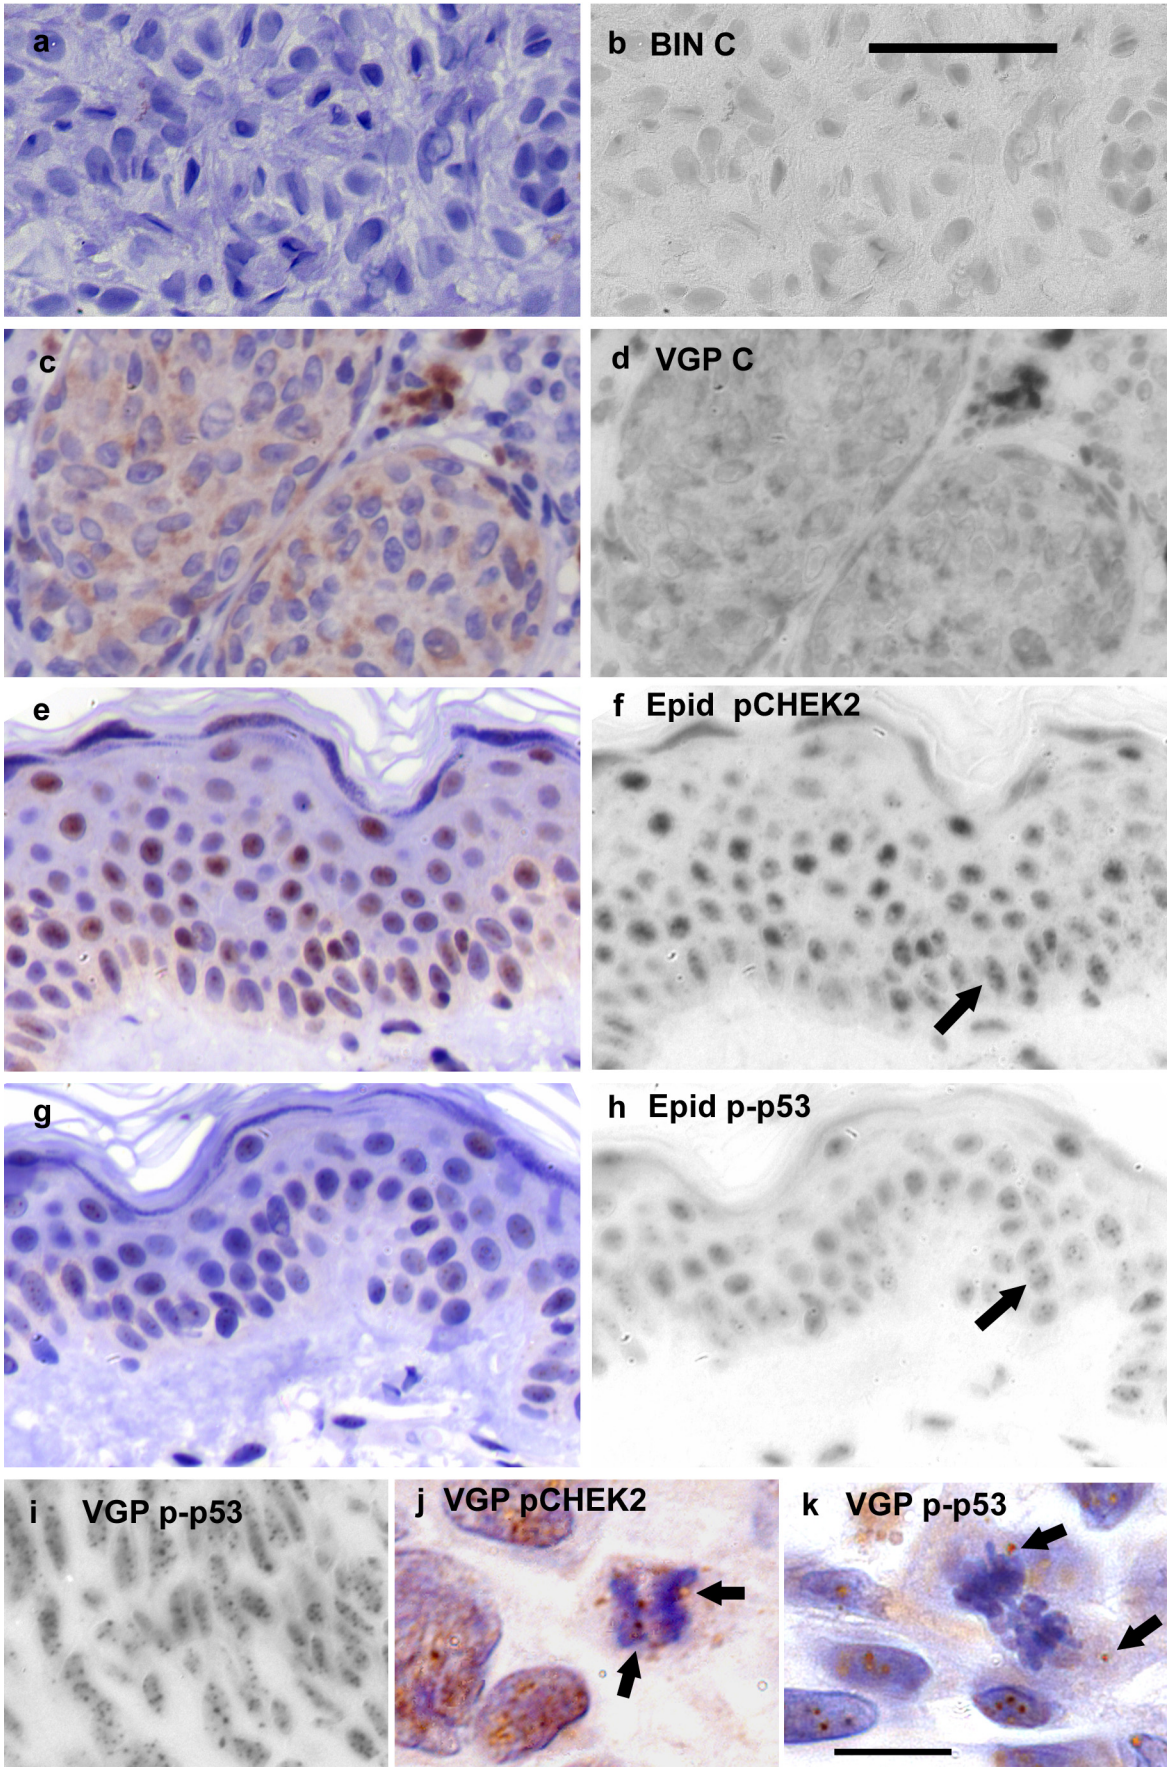

Figure S3

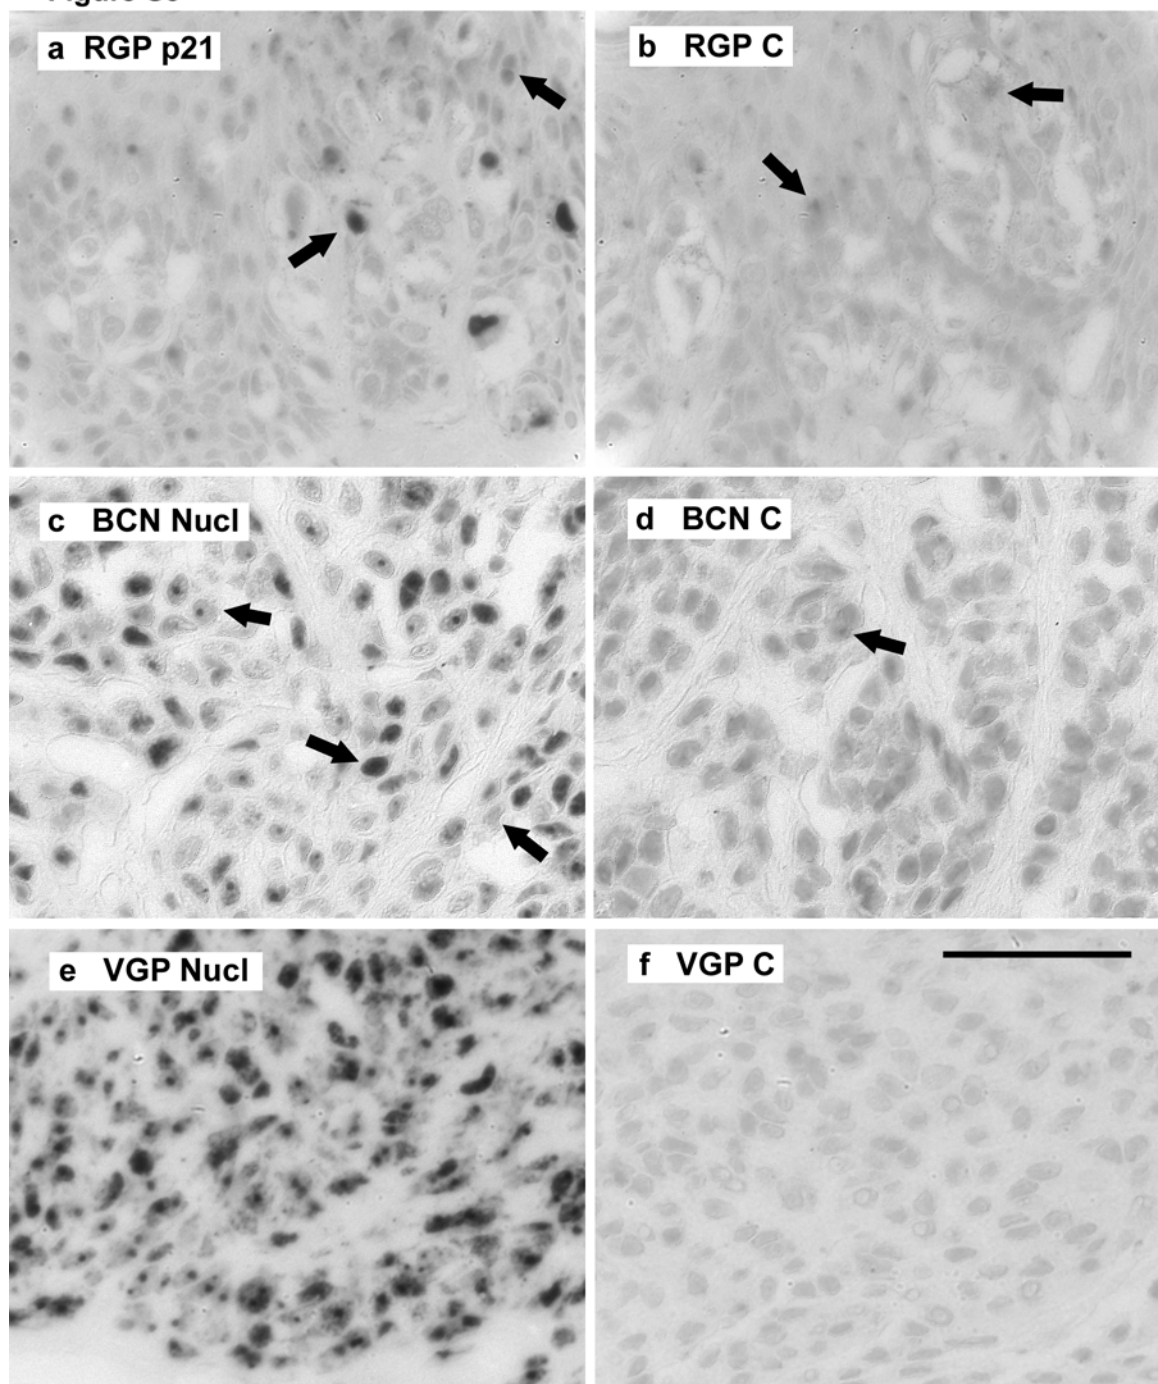

Supplement: pcmr0026-0226-sd1.pdf [file pcmr0026-0226-sd1.pdf]
